# Supplementary material for: Abundance estimates and habitat preferences of bottlenose dolphins reveal the importance of two gulfs in South Australia
Source: PubMed Central journal article supplement (PMC6541621; doi:10.1038/s41598-019-44310-3), 2019-05-29
Supplement: 41598_2019_44310_MOESM1_ESM.pdf [file 41598_2019_44310_MOESM1_ESM.pdf]

SUPPLEMENTARY INFORMATION

1

2 Title: Abundance estimates and habitat preferences of bottlenose dolphins reveal the importance of two gulfs in South Australia

3 Authors: Kerstin Bilgmann\*<sup>1,2,3</sup>; Guido J. Parra<sup>1</sup>; Lauren Holmes<sup>1</sup>; Katharina J. Peters<sup>1,4,5</sup>; Ian D. Jonsen<sup>3</sup>; Luciana M. Möller<sup>1,2</sup>

4 <sup>1</sup>Cetacean Ecology, Behaviour and Evolution Laboratory (CEBEL), College of Science and Engineering, Flinders University, GPO Box 2100, Adelaide,  
5 South Australia 5001, Australia

6 <sup>2</sup>Molecular Ecology Laboratory, College of Science and Engineering, Flinders University, GPO Box 2100, Adelaide, South Australia 5001, Australia

7 <sup>3</sup>Marine Vertebrate Conservation and Evolution Laboratory, Department of Biological Sciences, Faculty of Science and Engineering, Macquarie  
8 University, North Ryde, Sydney, NSW 2109, Australia

9 <sup>4</sup>Global Ecology, College of Science and Engineering, Flinders University, GPO Box 2100, Adelaide, South Australia 5001, Australia

10 <sup>5</sup>Coastal-Marine Research Group, School of Natural and Computational Sciences, Massey University, Auckland 0745, New Zealand

11 \*Corresponding author

12

13

14 Supplementary Table S1a and S1b:

15 Summary statistics of the Mark-Recapture Distance Sampling (MRDS) analyses in DISTANCE 7, for A: the summer/autumn survey; and B: the  
16 winter/spring survey. The most suitable model is marked with a black frame: DS and MR model components were fitted by systematically adding  
17 covariates one by one to build more complex models. Choice of model with 'best fit' was based on lowest AIC, lowest %CV and by assessing quantile-  
18 quantile (q-q) plots, Kolmogorov-Smirnov tests, and Cramer von Mises statistics. AIC = Akaike Information Criterion; D = Density; N = Abundance  
19 estimate over the study area; CV = Coefficient of Variance; df = degrees of freedom.

20 Supplementary Table S1a:

| <b>Analysis Engine_Key Function_DS Model_MR Model_Truncations</b>      | <b>Delta AIC</b> | <b>AIC</b> | <b>D</b> | <b>95% Confidence Interval</b> |       | <b>CV</b> | <b>N</b> | <b>%CV</b> | <b>df</b> | <b>95% Confidence Interval</b> |       |
|------------------------------------------------------------------------|------------------|------------|----------|--------------------------------|-------|-----------|----------|------------|-----------|--------------------------------|-------|
| MRDS_Hr_MCDS_beaufort-cloudcover_MR_distance_LT71_RT570                | 0.00             | 1097       | 0.08     | 0.055                          | 0.124 | 0.21      | 3493     | 20.70      | 101.53    | 2327                           | 5244  |
| MRDS_Hr_MCDS_beaufort-cloudcover_MR_distance_glare_LT71_RT570          | 0.00             | 1097       | 0.08     | 0.055                          | 0.124 | 0.21      | 3493     | 20.70      | 101.53    | 2327                           | 5244  |
| MRDS_Hr_MCDS_beaufort-cloudcover-glare_MR_distance_LT71_RT570          | 1.28             | 1099       | 0.08     | 0.054                          | 0.122 | 0.21      | 3448     | 20.57      | 101.65    | 2303                           | 5163  |
| MRDS_Hr_MCDS_beaufort-cloudcover-turbidity_MR_distance_LT71_RT570      | 1.96             | 1099       | 0.08     | 0.055                          | 0.123 | 0.21      | 3485     | 20.70      | 101.22    | 2321                           | 5232  |
| MRDS_Hr_MCDS_beaufort_MR_distance_LT71_RT570                           | 2.64             | 1100       | 0.08     | 0.053                          | 0.121 | 0.21      | 3416     | 20.90      | 102.65    | 2267                           | 5147  |
| MRDS_Hr_MCDS_beaufort-cloudcover-side_MR_distance_LT71_RT570           | 3.89             | 1101       | 0.08     | 0.022                          | 0.320 | 0.76      | 3522     | 76.42      | 78.61     | 913                            | 13586 |
| MRDS_Hr_MCDS_beaufort-glare_MR_distance_LT71_RT570                     | 3.91             | 1101       | 0.08     | 0.053                          | 0.120 | 0.21      | 3397     | 20.63      | 103.55    | 2266                           | 5093  |
| MRDS_Hr_MCDS_beaufort-trubidity_MR_distance_LT71_RT570                 | 4.60             | 1102       | 0.08     | 0.053                          | 0.121 | 0.21      | 3413     | 20.90      | 102.23    | 2265                           | 5144  |
| MRDS_Hn_MCDS_beaufort-cloudcover_MR_distance_LT71_RT570                | 5.81             | 1103       | 0.13     | 0.077                          | 0.204 | 0.25      | 5316     | 25.01      | 118.84    | 3264                           | 8658  |
| MRDS_Hn_MCDS_beaufort-cloudcover_MR_distance_glare_LT71_RT570          | 5.81             | 1103       | 0.13     | 0.077                          | 0.204 | 0.25      | 5316     | 25.01      | 118.84    | 3264                           | 8658  |
| MRDS_Hr_MCDS_beaufort-cloudcover-turbidity-side_MR_distance_LT71_RT570 | 5.86             | 1103       | 0.08     | 0.021                          | 0.320 | 0.77      | 3509     | 76.64      | 77.46     | 907                            | 13584 |
| MRDS_Hr_MCDS_cloudcover_MR_distance_LT71_RT570                         | 6.54             | 1104       | 0.09     | 0.059                          | 0.139 | 0.22      | 3839     | 21.81      | 102.75    | 2504                           | 5887  |
| MRDS_Hr_MCDS_beaufort-side_MR_distance_LT71_RT570                      | 6.54             | 1104       | 0.08     | 0.018                          | 0.358 | 0.88      | 3383     | 87.56      | 77.96     | 753                            | 15190 |
| MRDS_Hn_MCDS_beaufort-cloudcover-glare_MR_distance_LT71_RT570          | 7.34             | 1105       | 0.13     | 0.077                          | 0.202 | 0.25      | 5303     | 24.74      | 119.33    | 3273                           | 8592  |
| MRDS_Hn_MCDS_beaufort_MR_distance_LT71_RT570                           | 7.46             | 1105       | 0.12     | 0.073                          | 0.193 | 0.25      | 5053     | 24.86      | 123.29    | 3112                           | 8205  |
| MRDS_Hn_MCDS_cloudcover_MR_distance_LT71_RT570                         | 7.56             | 1105       | 0.12     | 0.076                          | 0.188 | 0.23      | 5091     | 23.05      | 110.95    | 3243                           | 7991  |
| MRDS_Hn_MCDS_beaufort-cloudcover-turbidity_MR_distance_LT71_RT570      | 7.77             | 1105       | 0.13     | 0.077                          | 0.204 | 0.25      | 5300     | 25.12      | 118.14    | 3248                           | 8650  |
| MRDS_Hn_MCDS_beaufort-glare_MR_distance_LT71_RT570                     | 8.22             | 1105       | 0.12     | 0.074                          | 0.193 | 0.25      | 5067     | 24.58      | 125.05    | 3138                           | 8183  |
| MRDS_Hr_CDS_MR_distance_LT71_RT570                                     | 8.96             | 1106       | 0.09     | 0.055                          | 0.133 | 0.22      | 3634     | 22.28      | 93.32     | 2347                           | 5625  |

| Analysis Engine_Key Function_DS Model_MR Model_Truncations             | Delta AIC | AIC  | D    | 95% Confidence Interval |       | CV   | N    | %CV    | df     | 95% Confidence Interval |        |
|------------------------------------------------------------------------|-----------|------|------|-------------------------|-------|------|------|--------|--------|-------------------------|--------|
| MRDS_Hn_MCDS_beaufort-turbidity_MR_distance_LT71_RT570                 | 9.46      | 1107 | 0.12 | 0.073                   | 0.194 | 0.25 | 5055 | 24.90  | 122.45 | 3111                    | 8214   |
| MRDS_Hr_MCDS_glare_MR_distance_LT71_RT570                              | 9.67      | 1107 | 0.09 | 0.056                   | 0.131 | 0.22 | 3617 | 21.78  | 98.60  | 2360                    | 5545   |
| MRDS_Hn_MCDS_glare_MR_distance_LT71_RT570                              | 10.64     | 1108 | 0.11 | 0.073                   | 0.176 | 0.23 | 4802 | 22.69  | 109.28 | 3080                    | 7487   |
| MRDS_Hr_MCDS_turbidity_MR_distance_LT71_RT570                          | 10.96     | 1108 | 0.09 | 0.055                   | 0.133 | 0.22 | 3633 | 22.29  | 93.12  | 2346                    | 5625   |
| MRDS_Hn_MCDS_beaufort-side_MR_distance_LT71_RT570                      | 11.33     | 1109 | 0.12 | 0.005                   | 2.897 | 3.45 | 5088 | 344.61 | 74.33  | 211                     | 122956 |
| MRDS_Hn_CDS_MR_distance_LT71_RT570                                     | 11.34     | 1109 | 0.11 | 0.072                   | 0.178 | 0.23 | 4808 | 22.95  | 98.62  | 3067                    | 7537   |
| MRDS_Hn_MCDS_beaufort-cloudcover-turbidity-side_MR_distance_LT71_RT570 | 11.76     | 1109 | 0.13 | 0.005                   | 3.024 | 3.44 | 5314 | 343.94 | 72.33  | 220                     | 128322 |
| MRDS_Hr_MCDS_side_MR_distance_LT71_RT570                               | 12.61     | 1110 | 0.09 | 0.011                   | 0.754 | 1.47 | 3778 | 146.95 | 76.06  | 446                     | 31985  |
| MRDS_Hn_MCDS_turbidity_MR_distance_LT71_RT570                          | 13.10     | 1110 | 0.11 | 0.072                   | 0.177 | 0.23 | 4795 | 23.04  | 99.41  | 3053                    | 7530   |
| MRDS_Hn_MCDS_side_MR_distance_LT71_RT570                               | 15.29     | 1113 | 0.11 | 0.004                   | 3.178 | 3.93 | 4811 | 393.06 | 75.27  | 172                     | 134864 |

21

22 Supplementary Table S1b:

| <b>Analysis Engine_Key Function_DS Model_MR Model_Truncations</b> | <b>Delta AIC</b> | <b>AIC</b> | <b>D</b> | <b>95% Confidence Interval</b> |       | <b>CV</b> | <b>N</b> | <b>%CV</b> | <b>df</b> | <b>95% Confidence Interval</b> |      |
|-------------------------------------------------------------------|------------------|------------|----------|--------------------------------|-------|-----------|----------|------------|-----------|--------------------------------|------|
| MRDS_Hn_MCDS_glare-cloudcover_MR_distance_LT71_RT660              | 0.00             | 1613       | 0.09     | 0.063                          | 0.142 | 0.21      | 4006     | 20.60      | 83.48     | 2671                           | 6009 |
| MRDS_Hn_MCDS_glare-cloudcover_MR_distance_beaufort_LT71_RT660     | 0.00             | 1613       | 0.09     | 0.063                          | 0.142 | 0.21      | 4006     | 20.60      | 83.48     | 2671                           | 6009 |
| MRDS_Hn_MCDS_glare-cloudcover_MR_distance_turbidity_LT71_RT660    | 0.00             | 1613       | 0.09     | 0.063                          | 0.142 | 0.21      | 4006     | 20.60      | 83.48     | 2671                           | 6009 |
| MRDS_Hn_MCDS_glare-cloudcover_MR_distance_side_LT71_RT660         | 0.00             | 1613       | 0.09     | 0.063                          | 0.142 | 0.21      | 4006     | 20.60      | 83.48     | 2671                           | 6009 |
| MRDS_Hr_MCDS_glare-cloudcover_MR_distance_LT71_RT660              | 0.06             | 1613       | 0.08     | 0.051                          | 0.113 | 0.20      | 3213     | 20.36      | 75.77     | 2151                           | 4801 |
| MRDS_Hr_MCDS_glare-cloudcover_MR_distance_beaufort_LT71_RT660     | 0.06             | 1613       | 0.08     | 0.051                          | 0.113 | 0.20      | 3213     | 20.36      | 75.77     | 2151                           | 4801 |
| MRDS_Hr_MCDS_glare-cloudcover_MR_distance_turbidity_LT71_RT660    | 0.06             | 1613       | 0.08     | 0.051                          | 0.113 | 0.20      | 3213     | 20.36      | 75.77     | 2151                           | 4801 |
| MRDS_Hr_MCDS_glare-cloudcover_MR_distance_side_LT71_RT660         | 0.06             | 1613       | 0.08     | 0.051                          | 0.113 | 0.20      | 3213     | 20.36      | 75.77     | 2151                           | 4801 |
| MRDS_Hr_MCDS_glare_MR_distance_LT71_RT660                         | 0.09             | 1613       | 0.08     | 0.051                          | 0.117 | 0.21      | 3276     | 21.10      | 75.22     | 2162                           | 4964 |
| MRDS_Hn_MCDS_glare-side_MR_distance_LT71_RT660                    | 0.59             | 1614       | 0.10     | 0.062                          | 0.150 | 0.22      | 2007     | 22.21      | 83.08     | 1325                           | 3040 |
| MRDS_Hn_MCDS_glare_MR_distance_LT71_RT660                         | 1.22             | 1614       | 0.09     | 0.062                          | 0.142 | 0.21      | 3987     | 20.90      | 72.86     | 2640                           | 6020 |
| MRDS_Hr_MCDS_glare-side_MR_distance_LT71_RT660                    | 1.48             | 1615       | 0.08     | 0.050                          | 0.114 | 0.21      | 3197     | 20.89      | 70.89     | 2117                           | 4828 |
| MRDS_Hr_MCDS_glare-turbidity_MR_distance_LT71_RT660               | 1.83             | 1615       | 0.08     | 0.051                          | 0.118 | 0.21      | 3291     | 21.10      | 77.49     | 2172                           | 4987 |
| MRDS_Hr_MCDS_glare-beaufort_MR_distance_LT71_RT660                | 2.09             | 1615       | 0.08     | 0.051                          | 0.117 | 0.21      | 3275     | 21.09      | 75.17     | 2161                           | 4962 |
| MRDS_Hn_MCDS_glare-turbidity_MR_distance_LT71_RT660               | 2.69             | 1616       | 0.09     | 0.062                          | 0.141 | 0.21      | 3988     | 20.73      | 74.43     | 2650                           | 6001 |
| MRDS_Hn_MCDS_glare-beaufort_MR_distance_LT71_RT660                | 3.22             | 1616       | 0.09     | 0.062                          | 0.142 | 0.21      | 3984     | 20.88      | 73.03     | 2640                           | 6013 |
| MRDS_Hr_MCDS_cloudcover_MR_distance_LT71_RT660                    | 8.53             | 1622       | 0.07     | 0.048                          | 0.106 | 0.20      | 3023     | 20.19      | 72.41     | 2029                           | 4503 |
| MRDS_Hn_CDS_MR_distance_LT71_RT660                                | 8.61             | 1622       | 0.09     | 0.059                          | 0.135 | 0.21      | 3803     | 20.80      | 69.06     | 2523                           | 5734 |
| MRDS_Hr_CDS_MR_distance_LT71_RT660                                | 8.61             | 1622       | 0.09     | 0.059                          | 0.135 | 0.21      | 3803     | 20.80      | 69.06     | 2523                           | 5734 |
| MRDS_Hn_MCDS_cloudcover_MR_distance_LT71_RT660                    | 8.88             | 1622       | 0.09     | 0.060                          | 0.134 | 0.20      | 3801     | 20.23      | 73.13     | 2550                           | 5666 |

| Analysis Engine_Key Function_DS Model_MR Model_Truncations | Delta AIC | AIC  | D    | 95% Confidence Interval |       | CV   | N    | %CV   | df    | 95% Confidence Interval |      |
|------------------------------------------------------------|-----------|------|------|-------------------------|-------|------|------|-------|-------|-------------------------|------|
| MRDS_Hn_MCDS_side_MR_distance_LT71_RT660                   | 9.36      | 1623 | 0.09 | 0.060                   | 0.137 | 0.21 | 3842 | 20.86 | 71.32 | 2546                    | 5799 |
| MRDS_Hr_MCDS_side_MR_distance_LT71_RT660                   | 10.09     | 1623 | 0.07 | 0.046                   | 0.103 | 0.20 | 2927 | 20.45 | 66.46 | 1954                    | 4385 |
| MRDS_Hn_MCDS_beaufort_MR_distance_LT71_RT660               | 10.61     | 1624 | 0.09 | 0.059                   | 0.135 | 0.21 | 3802 | 20.78 | 69.20 | 2523                    | 5729 |
| MRDS_Hn_MCDS_turbidity_MR_distance_LT71_RT660              | 10.61     | 1624 | 0.09 | 0.059                   | 0.135 | 0.21 | 3801 | 20.89 | 70.32 | 2517                    | 5740 |
| MRDS_Hr_MCDS_turbidity_MR_distance_LT71_RT660              | 10.74     | 1624 | 0.07 | 0.049                   | 0.111 | 0.21 | 3129 | 20.97 | 74.16 | 2070                    | 4731 |
| MRDS_Hr_MCDS_beaufort_MR_distance_LT71_RT660               | 11.00     | 1624 | 0.07 | 0.047                   | 0.106 | 0.21 | 2992 | 20.59 | 68.58 | 1993                    | 4492 |

23
